# Supplementary material for: A Hereditary Enteropathy Caused by Mutations in the SLCO2A1 Gene, Encoding a Prostaglandin Transporter
Source: PubMed Central journal article supplement (PMC4634957; doi:10.1371/journal.pgen.1005581), 2015-11-05
Supplement: pgen.1005581.s001.pdf [file pgen.1005581.s001.pdf]

S1 Table. Summary of Whole-exome Sequencing Data

| Subjects                                                     | A-V-2          | B-IV-3         | C-IV-3         | D-II-4      | D-II-5      | A-V-3<br>(unaffected) |
|--------------------------------------------------------------|----------------|----------------|----------------|-------------|-------------|-----------------------|
| Total number of sequenced reads passing QC ( $\times 10^6$ ) | 103.5          | 111.0          | 93.1           | 117.6       | 97.9        | 111.6                 |
| Total number of mapped reads ( $\times 10^6$ )               | 103.1          | 110.4          | 92.4           | 117.2       | 97.5        | 110.8                 |
| Mean target coverage                                         | 66.7           | 71.2           | 55.8           | 82.8        | 65.1        | 71.8                  |
| % targets with 10 $\times$ coverage                          | 91.7           | 93.5           | 92.7           | 92.7        | 91.7        | 92.9                  |
| Number of identified variants                                |                |                |                |             |             |                       |
| SNV/indel                                                    | 107,406        | 112,602        | 105,357        | 110,880     | 107,840     | 104,545               |
| NS/SS                                                        | 9,436          | 9,477          | 9,095          | 9,544       | 9,285       | 8,937                 |
| Number of candidate genes                                    |                |                |                |             |             |                       |
| NS/SS (homozygous/heterozygous)                              | 2,731/3,227    | 2,797/3,253    | 2,775/3,023    | 2,727/3,367 | 2,659/3,343 | 2,754/2,921           |
| Not in dbSNP135<br>(homozygous/heterozygous)                 | <u>27</u> /286 | <u>25</u> /265 | <u>29</u> /257 | 18/294      | 16/265      | 22/159                |

SNV, single nucleotide variant; indel, insertion/deletion; NS, non-synonymous mutation; SS, splice-site mutation.
