# Supplementary material for: A Hereditary Enteropathy Caused by Mutations in the SLCO2A1 Gene, Encoding a Prostaglandin Transporter
Source: PubMed Central journal article supplement (PMC4634957; doi:10.1371/journal.pgen.1005581), 2015-11-05
Supplement: pgen.1005581.s002.pdf [file pgen.1005581.s002.pdf]

S2 Table. Clinical Manifestations of Primary Hypertrophic Osteoarthropathy in Patients with Chronic Nonspecific Multiple Ulcers of the Small Intestine

| Patients                       | 1     | 2      | 3      | 4      | 5      | 6  | 7  | 8  | 9  | 10 | 11 | 12 | 13 | 14 | 15 | 16 | 17 | 18 |
|--------------------------------|-------|--------|--------|--------|--------|----|----|----|----|----|----|----|----|----|----|----|----|----|
|                                | A-V-2 | B-IV-3 | C-IV-3 | D-II-4 | D-II-5 |    |    |    |    |    |    |    |    |    |    |    |    |    |
| Sex                            | F     | F      | F      | F      | F      | F  | F  | F  | F  | F  | M  | M  | F  | F  | F  | M  | M  | F  |
| Current age (yr)               | 57    | 75     | 58     | 61     | 59     | 51 | 42 | 52 | 72 | 59 | 42 | 63 | 56 | 40 | 18 | 70 | 28 | 75 |
| Skeletal manifestations        |       |        |        |        |        |    |    |    |    |    |    |    |    |    |    |    |    |    |
| Digital clubbing               | +     | -      | -      | -      | -      | -  | -  | -  | +  | -  | -  | +  | -  | -  | -  | +  | +  | +  |
| Periostosis                    | -     | -      | -      | NA     | -      | NA | NA | -  | +  | -  | -  | +  | +  | -  | NA | +  | +  | +  |
| Acro-osteolysis                | -     | -      | -      | NA     | -      | NA | NA | -  | -  | -  | -  | -  | -  | -  | NA | -  | -  | -  |
| Arthralgia of large joints     | -     | -      | -      | -      | +      | -  | -  | +  | -  | -  | -  | -  | -  | +  | -  | -  | -  | +  |
| Knee-joint effusions           | -     | -      | -      | -      | -      | -  | -  | -  | -  | -  | -  | -  | -  | -  | -  | -  | -  | +  |
| Skin manifestations            |       |        |        |        |        |    |    |    |    |    |    |    |    |    |    |    |    |    |
| Hyperhidrosis                  | -     | -      | -      | -      | +      | -  | -  | -  | -  | -  | -  | -  | -  | +  | -  | -  | -  | -  |
| Pachydermia                    | -     | -      | -      | -      | -      | -  | -  | -  | -  | -  | -  | +  | -  | -  | -  | +  | +  | -  |
| Seborrhea                      | -     | -      | -      | -      | -      | -  | -  | -  | -  | -  | -  | +  | -  | -  | -  | -  | -  | -  |
| Acne                           | -     | -      | -      | +      | +      | -  | -  | -  | -  | -  | -  | -  | -  | +  | -  | -  | -  | -  |
| Flushing                       | -     | -      | -      | -      | +      | -  | -  | -  | -  | -  | -  | +  | -  | -  | -  | -  | +  | -  |
| Developmental manifestations   |       |        |        |        |        |    |    |    |    |    |    |    |    |    |    |    |    |    |
| Patent ductus arteriosus       | -     | -      | -      | -      | -      | -  | -  | -  | -  | -  | -  | -  | -  | -  | -  | -  | -  | -  |
| Delayed cranial suture closure | -     | -      | -      | -      | -      | -  | -  | -  | -  | -  | -  | -  | -  | -  | -  | -  | -  | -  |

NA, not available.
