# Supplementary material for: A Hereditary Enteropathy Caused by Mutations in the SLCO2A1 Gene, Encoding a Prostaglandin Transporter
Source: PubMed Central journal article supplement (PMC4634957; doi:10.1371/journal.pgen.1005581), 2015-11-05
Supplement: pgen.1005581.s003.pdf [file pgen.1005581.s003.pdf]

S3 Table. Clinical Criteria of Chronic Nonspecific Multiple Ulcers of the Small Intestine

- 1 Persistent and occult blood loss from the GI tract except during bowel rest or postoperative period.
- 2 Confirmation of characteristic small intestinal lesions by macroscopy, radiography, or enteroscopy.
  - i Circular or oblique in alignment.
  - ii Sharply demarcated from surrounding normal mucosa.
  - iii Geographic or linear in shape.
  - iv Multiplicity in number with < 4-cm distance from each other.
  - v Ulcers not reaching proper muscular layer.
  - vi Scarred ulcers presumed to be the healing stage of those characterized by i-v\* in cases treated by bowel rest.

\*Depicted as symmetric and eccentric rigidity under small-bowel radiography, and concentric or nonconcentric stricture under enteroscopy. GI, gastrointestinal.
