# Supplementary material for: A Hereditary Enteropathy Caused by Mutations in the SLCO2A1 Gene, Encoding a Prostaglandin Transporter
Source: PubMed Central journal article supplement (PMC4634957; doi:10.1371/journal.pgen.1005581), 2015-11-05
Supplement: pgen.1005581.s004.pdf [file pgen.1005581.s004.pdf]

S4 Table. Primers for Mutation Analysis of *SLCO2A1* Gene

| Amplicon | Forward (5'–3')        | Reverse (5'–3')       | Size (bp) | RFLP*              |
|----------|------------------------|-----------------------|-----------|--------------------|
| Exon 1   | GCCTGGAGTTGTCCGAGTAAG  | TTTGACACCCGAGGAAAAGAG | 620       |                    |
| Exon 2   | ACAGAATTTGAAGGCGGACAG  | TGATGACGTTTCATCCTGGAG | 655       |                    |
| Exon 3   | AATGCTTTGATCCTCCTCCTG  | CAGAGGGAAAACCAAATTGC  | 676       |                    |
| Exon 4   | GCTGTTGGTTTAGGGTCCATC  | CCCACATTCCACCTCTCTTTC | 786       |                    |
| Exon 5   | AAGGGCAGAAAGTGAGTTTGC  | GCAGGTCTCTTTGGAAGTTGG | 570       |                    |
| Exon 6   | AATTCAGCCACCCTCAACAC   | CAATAGCTGGGAGAGGGAATG | 742       |                    |
| Exon 7-8 | GATTGCCAACCAGGAAAACCTG | AGGTGCTGTTTGCTTCAGGAG | 778       | <i>HpyCH4IV</i>    |
| Exon 9   | AGTTGCCACGTGAGAGATCAG  | GTGTAGGCAAGGCAATCCTG  | 860       |                    |
| Exon 10  | TGCTTTGACTGGTTTCTGCTC  | TGGTTGTCTTGACGCCTACTG | 747       | <i>HapII, BsrI</i> |
| Exon 11  | GCAAAGAACCTTGCACATTG   | GCCTCCCTCTGCAATAAACAC | 710       |                    |
| Exon 12  | AAACCGTCCACATGGATTTTG  | CAGCATCCTTCTCTCCACTCC | 643       |                    |
| Exon 13  | GTGGCCCTTCATGTTCTCTTC  | GCCCGTGTATCTCCACTCTG  | 564       |                    |
| Exon 14  | CAAATGAGGACTGGGGTTTTTC | GAAGACCACAAAAGGGACAGG | 617       |                    |

\**HpyCH4IV*, *HapII*, and *BsrI* were used for genotyping of c.940+1G>A, c.1372G>T, and c.1461+1G>C mutations, respectively. RFLP, restriction fragment length polymorphism.
