# Supplementary material for: A Hereditary Enteropathy Caused by Mutations in the SLCO2A1 Gene, Encoding a Prostaglandin Transporter
Source: PubMed Central journal article supplement (PMC4634957; doi:10.1371/journal.pgen.1005581), 2015-11-05
Supplement: pgen.1005581.s005.pdf [file pgen.1005581.s005.pdf]

S5 Table. Primers for mRNA Analysis

| Amplicon  | Forward (5'-3')       | Reverse (5'-3')      | Size (bp) |
|-----------|-----------------------|----------------------|-----------|
| Exon 6-9  | AGGCCTGCTCATTCTTCAG   | ACAAAGCGCTTCATGAGGAT | 396       |
| Exon 8-13 | GCACCTTCTCCTCCGTCATTG | CGTTGTCATAGTAGGCAGG  | 792       |
