# Supplementary material for: A Hereditary Enteropathy Caused by Mutations in the SLCO2A1 Gene, Encoding a Prostaglandin Transporter
Source: PubMed Central journal article supplement (PMC4634957; doi:10.1371/journal.pgen.1005581), 2015-11-05
Supplement: pgen.1005581.s006.pdf [file pgen.1005581.s006.pdf]

S6 Table. Primers for Construction of Expression Vectors for Mutant *SLCO2A1* Genes

| Mutation                     | Forward (5'-3')                   | Reverse (5'-3')                |
|------------------------------|-----------------------------------|--------------------------------|
| c.940+1G>A                   | GGTTTCCATGCATCTTTCTGAGGC          | CTTTGCTCCTATGGGCATTGCTC        |
| c.940+1G>A (for GFP-SLCO2A1) | ACGCGTACGCGGCCGCTCGAG             | GAAAGATGCATGGAAACCCTTTGC       |
| p.Gly222Arg                  | AGGTACCTGCTGGGCTCTGTCATGCTGC      | GAAAGCCGGTCCAAATACAGAGATGGC    |
| p.Arg603X                    | TGAGACAGGTACCTGGGCCTGCAGATGGG     | GAGAGCATCGTTGTCATAGTAGGCCGCAGG |
| p.Glu141X                    | TAGCTCTGCCAGAAGCATTGGCAGGACC      | GGCCTGCAAGCGGCTGTTGTTCCCAGTGC  |
| p.Gly183Arg                  | AGGACAGTGCCTATTCAGCCATTTGGG       | GATGCCAGCCAGCAGCTGGGCAACCACC   |
| p.Val458Phe                  | ACCCGTTCTGTGGAGACAATGGAATCGAGTACC | GGAAGATAGAATCTGGGCACGAGCAGTCCC |
